# Supplementary material for: PQM130, a Novel Feruloyl–Donepezil Hybrid Compound, Effectively Ameliorates the Cognitive Impairments and Pathology in a Mouse Model of Alzheimer’s Disease
Source: PubMed Central journal article supplement (PMC6581760; doi:10.3389/fphar.2019.00658), 2019-06-12
Supplement: DataSheet_2.pdf [file DataSheet_2.pdf]

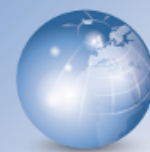

# Report

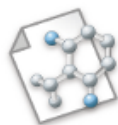

**Prediction and Applicability Domain analysis for models:**

**Carcinogenicity model (IRFMN/Antares) 1.0.0**

Core version: 1.2.4

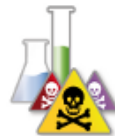

## 1. Prediction Summary

### Prediction for compound Molecule 0

|                                                                                   |                                                                                                                                                                                                                                                                                                                                                                                                |
|-----------------------------------------------------------------------------------|------------------------------------------------------------------------------------------------------------------------------------------------------------------------------------------------------------------------------------------------------------------------------------------------------------------------------------------------------------------------------------------------|
| 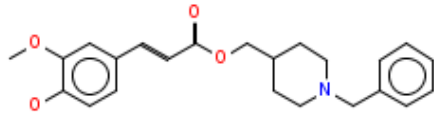 | <p>Prediction:  Reliability: </p> <p><b>Prediction is Possible NON-Carcinogen, the result appears reliable. Anyhow, you should check it through the evaluation of the information given in the following sections.</b></p> |
|-----------------------------------------------------------------------------------|------------------------------------------------------------------------------------------------------------------------------------------------------------------------------------------------------------------------------------------------------------------------------------------------------------------------------------------------------------------------------------------------|

Compound: Molecule 0

Compound SMILES: O=C(OCC2CCN(Cc1ccccc1)CC2)C=Cc3ccc(O)c(OC)c3

Experimental value: -

Predicted Mutagen activity: Possible NON-Carcinogen

No. alerts for carcinogenicity: 0

Structural alerts: -

Reliability: the predicted compound is into the Applicability Domain of the model

Remarks:

none

### 3.1 Applicability Domain: Similar Compounds, with Predicted and Experimental Values

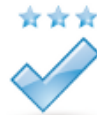

|                                                                                     |                                                                                                                                                                                                                                                                                                                                                                  |
|-------------------------------------------------------------------------------------|------------------------------------------------------------------------------------------------------------------------------------------------------------------------------------------------------------------------------------------------------------------------------------------------------------------------------------------------------------------|
| 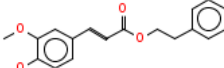   | <p>Compound #1</p> <p>CAS: N.A.<br/>           Dataset id: 660 (Training set)<br/>           SMILES: <chem>O=C(OCCc1ccccc1)C=Cc2ccc(O)c(OC)c2</chem><br/>           Similarity: 0.878</p> <p>Experimental value: NON-Carcinogen<br/>           Predicted value: Possible NON-Carcinogen</p>                                                                      |
|    | <p>Compound #2</p> <p>CAS: N.A.<br/>           Dataset id: 786 (Training set)<br/>           SMILES: <chem>O=C(C=Cc1ccc(O)c(OC)c1)CC(=O)C=Cc2ccc(O)c(OC)c2</chem><br/>           Similarity: 0.831</p> <p>Experimental value: NON-Carcinogen<br/>           Predicted value: Possible NON-Carcinogen</p>                                                         |
|   | <p>Compound #3</p> <p>CAS: N.A.<br/>           Dataset id: 869 (Training set)<br/>           SMILES: <chem>O=C(c1ccccc1(OCC(O)CNCCC))CCc2ccccc2</chem><br/>           Similarity: 0.792</p> <p>Experimental value: NON-Carcinogen<br/>           Predicted value: Possible NON-Carcinogen</p>                                                                    |
|  | <p>Compound #4</p> <p>CAS: N.A.<br/>           Dataset id: 1450 (Training set)<br/>           SMILES: <chem>O=C(OC(CC)C(c1ccccc1)(c2ccccc2)CC(N(C)C)C)</chem><br/>           Similarity: 0.792</p> <p>Experimental value: NON-Carcinogen<br/>           Predicted value: Possible NON-Carcinogen</p>                                                             |
|  | <p>Compound #5</p> <p>CAS: N.A.<br/>           Dataset id: 1226 (Training set)<br/>           SMILES: <chem>O=C(OC(CC)C(c1ccccc1)(c2ccccc2)CC(C)[NH+](C)C)</chem><br/>           Similarity: 0.791</p> <p>Experimental value: Carcinogen<br/>           Predicted value: Possible NON-Carcinogen</p>                                                             |
|  | <p>Compound #6</p> <p>CAS: N.A.<br/>           Dataset id: 999 (Training set)<br/>           SMILES: <chem>Oc1ccc(cc1)C(c2ccc(OCCN(C)C)cc2)=C(c3ccccc3)CC</chem><br/>           Similarity: 0.785</p> <p>Experimental value: NON-Carcinogen<br/>           Predicted value: Carcinogen</p> <p>Alerts (not found in the target): Carcinogenicity alert no. 89</p> |

## 3.2 Applicability Domain: Measured Applicability Domain Scores

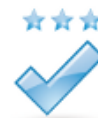

|  |                                                                                                                                                                                                  |
|--|--------------------------------------------------------------------------------------------------------------------------------------------------------------------------------------------------|
|  | <b>Global AD Index</b><br>AD index = 0.91<br>Explanation: the predicted compound is into the Applicability Domain of the model.                                                                  |
|  | <b>Similar molecules with known experimental value</b><br>Similarity index = 0.828<br>Explanation: strongly similar compounds with known experimental value in the training set have been found. |
|  | <b>Accuracy of prediction for similar molecules</b><br>Accuracy index = 1<br>Explanation: accuracy of prediction for similar molecules found in the training set is good.                        |
|  | <b>Concordance for similar molecules</b><br>Concordance index = 1<br>Explanation: similar molecules found in the training set have experimental values that agree with the predicted value.      |
|  | <b>Atom Centered Fragments similarity check</b><br>ACF index = 1<br>Explanation: all atom centered fragment of the compound have been found in the compounds of the training set.                |

Symbols explanation:

- The feature has a good assessment, model is reliable regarding this aspect.
- The feature has a non optimal assessment, this aspect should be reviewed by an expert.
- The feature has a bad assessment, model is not reliable regarding this aspect.

## References and Documentation

---

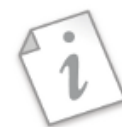

You can find complete details on each model and on how to read results in the proper model's guide, available on-line at [www.vega-qsar.eu](http://www.vega-qsar.eu) or directly in the VegaNIC application.

### **Carcinogenicity model (IRFMN/Antares) (version 1.0.0)**

QSAR classification model for Carcinogenicity based on a set of rules built with SarPy software extracted from the Antares dataset. Developed by Istituto Mario Negri, Italy; SarPy software developed by Politecnico di Milano, Italy. Model developed inside the VEGA platform.
