# Supplementary material for: PQM130, a Novel Feruloyl–Donepezil Hybrid Compound, Effectively Ameliorates the Cognitive Impairments and Pathology in a Mouse Model of Alzheimer’s Disease
Source: PubMed Central journal article supplement (PMC6581760; doi:10.3389/fphar.2019.00658), 2019-06-12
Supplement: DataSheet_3.pdf [file DataSheet_3.pdf]

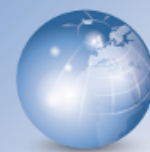

# Report

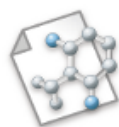

**Prediction and Applicability Domain analysis for models:**

**Mutagenicity (Ames test) CONSENSUS model 1.0.2**

Core version: 1.2.4

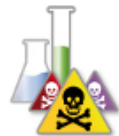

## 1. Prediction Summary

### Prediction for compound Molecule 0

|                                                                                   |                                                                                                                                                                                                   |
|-----------------------------------------------------------------------------------|---------------------------------------------------------------------------------------------------------------------------------------------------------------------------------------------------|
| 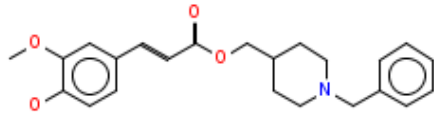 | <p>Prediction: </p> <p><b>Prediction is NON-Mutagenic with a consensus score of 0.57, based on 4 models.</b></p> |
|-----------------------------------------------------------------------------------|---------------------------------------------------------------------------------------------------------------------------------------------------------------------------------------------------|

Compound: Molecule 0

Compound SMILES: O=C(OCC2CCN(Cc1ccccc1)CC2)C=Cc3ccc(O)c(OC)c3

Used models: 4

Predicted Consensus Mutagen activity: NON-Mutagenic

Mutagenic Score: 0

Non-Mutagenic Score: 0.57

Model Caesar assessment: NON-Mutagenic (moderate reliability)

Model ISS assessment: NON-Mutagenic (low reliability)

Model SarPy assessment: NON-Mutagenic (moderate reliability)

Model KNN assessment: NON-Mutagen (good reliability)

Remarks:

none

## References and Documentation

---

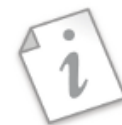

You can find complete details on each model and on how to read results in the proper model's guide, available on-line at [www.vega-qsar.eu](http://www.vega-qsar.eu) or directly in the VegaNIC application.

### **Mutagenicity (Ames test) CONSENSUS model (version 1.0.2)**

Mutagenicity (Ames test) Consensus model, based on the predictions of the available VEGA mutagenicity models (Caesar, SarPy, ISS and KNN).
